# Supplementary material for: A Systems Biology Approach Using Transcriptomic Data Reveals Genes and Pathways in Porcine Skeletal Muscle Affected by Dietary Lysine
Source: PubMed Central journal article supplement (PMC5412465; doi:10.3390/ijms18040885), 2017-04-21
Supplement: ijms-18-00885-s001.pdf [file ijms-18-00885-s001.pdf]

**Supplemental Table S1** A list of genes or gene transcripts that were differentially expressed among pigs fed three different diets

| Transcript ID <sup>a</sup> | Gene Symbol | Gene Description <sup>b</sup>                                        | GenBank <sup>c</sup> | <i>P</i> -value <sup>d</sup> |
|----------------------------|-------------|----------------------------------------------------------------------|----------------------|------------------------------|
| 15263546                   | ALKBH7      | AlkB, alkylation repair homolog 7                                    | XM_003123112         | 0.002                        |
| 15184804                   | AMD1        | Adenosylmethionine decarboxylase 1                                   | XM_003121345         | 0.001                        |
| 15314841                   | ATP6V1G2    | Atpase, H <sup>+</sup> transporting, lysosomal 13 kda, V1 subunit G2 | NM_001145380         | 0.003                        |
| 15314665                   | C7H6orf136  | Chromosome 6 open reading frame 136                                  | NM_001243459         | 0.009                        |
| 15229626                   | CCDC25      | Coiled-coil domain containing 25                                     | NM_001243572         | 0.006                        |
| 15184906                   | CD164       | CD164 molecule                                                       | XM_001924626         | 0.005                        |
| 15296214                   | CFAP20      | Cilia and flagella associated protein 20                             | NM_001244786         | 0.002                        |
| 15255767                   | CFD         | Complement factor D (adipsin)                                        | XM_003122985         | 0.003                        |
| 15332101                   | CHIT1       | Chitinase 1 (chitotriosidase)                                        | XM_003130296         | 0.010                        |
| 15329843                   | CHORDC1     | Cysteine and histidine-rich domain (CHORD) containing 1              | NM_001113446         | 0.001                        |
| 15259346                   | CHSY3       | Chondroitin sulfate synthase 3                                       | XM_003123906         | 0.002                        |
| 15220865                   | CIDEC       | Cell death-inducing DFFA-like effector c                             | NM_001112689         | 0.006                        |
| 15286963                   | CLCA2       | Chloride channel accessory 2                                         | XM_003125930         | 0.010                        |
| 15202461                   | CNTFR       | Ciliary neurotrophic factor receptor                                 | XM_003130672         | 0.008                        |
| 15209728                   | CNTROB      | Centrobin, centrosomal BRCA2 interacting protein                     | XM_003358269         | 0.006                        |
| 15319886                   | CPEB2       | Cytoplasmic polyadenylation element binding protein 2                | NM_001185049         | 0.001                        |
| 15248533                   | CST9L       | Cystatin-9 like                                                      | XM_003134304         | 0.008                        |
| 15215166                   | CXCR6       | Chemokine (C-X-C motif) receptor 6                                   | NM_001001623         | 0.001                        |
| 15255294                   | DBX1        | Developing brain homeobox 1                                          | XM_003122916         | 0.004                        |
| 15202526                   | DNAJA1      | Dnaj (Hsp40) homolog, subfamily A, member 1                          | NM_001244163         | 0.000                        |
| 15267072                   | DND1        | DND microrna-mediated repression inhibitor 1                         | XM_003124043         | 0.004                        |
| 15246704                   | EIF2        | Eukaryotic translation initiation factor 2                           | XM_005672861         | 0.002                        |
| 15249075                   | EIF2        | Eukaryotic translation initiation factor 2                           | XM_005672861         | 0.002                        |
| 15276460                   | ERLEC1      | Endoplasmic reticulum lectin 1                                       | XM_003125147         | 0.009                        |
| 15288283                   | ESYT1       | Extended synaptotagmin-like protein 1                                | XM_003126262         | 0.006                        |
| 15297540                   | FUT1        | Fucosyltransferase 1                                                 | NM_214068            | 0.004                        |
| 15194689                   | GABPB1      | GA binding protein transcription factor, beta subunit 1              | XM_005659610         | 0.005                        |
| 15288427                   | GPR182      | G protein-coupled receptor 182                                       | XM_003126290         | 0.001                        |
| 15216623                   | H1FOO       | Oocyte-specific H1 histone                                           | NM_001205063         | 0.007                        |
| 15251282                   | HOXA11B     | Homeobox A11                                                         | AF453292             | 0.001                        |
| 15251306                   | HOXA4       | Homeobox A4                                                          | XM_003134841         | 0.003                        |
| 15313557                   | HSP90AA1    | Heat shock protein 90kda alpha (cytosolic), class A member 1         | NM_213973            | 0.009                        |
| 15310151                   | HSP90AB1    | Heat shock protein 90kda alpha (cytosolic), class B member 1         | NM_001244433         | 0.005                        |

|          |              |                                                                                   |              |       |
|----------|--------------|-----------------------------------------------------------------------------------|--------------|-------|
| 15204824 | HSPH1        | Heat shock 105kda/110kda protein 1                                                | NM_001097504 | 0.008 |
| 15276892 | LCLAT1       | Lysocardiolipin acyltransferase 1                                                 | NM_001142845 | 0.003 |
| 15302843 | LGALS13      | Lectin, galactoside-binding, soluble, 13                                          | NM_001142841 | 0.005 |
| 15253268 | LOC100625033 | Uncharacterized                                                                   | XM_003360198 | 0.009 |
| 15185014 | ME1          | Malic enzyme 1, NADP <sup>+</sup> -dependent, cytosolic                           | XM_001924333 | 0.005 |
| 15245225 | MFAP3        | Microfibrillar-associated protein 3                                               | XM_003134126 | 0.003 |
| 15263058 | MIR3187      | Microrna 3187                                                                     | NR_036154    | 0.006 |
| 15337580 | MORF4L2      | Mortality factor 4 like 2                                                         | XM_003135267 | 0.010 |
| 15292502 | MYL6         | Myosin, light chain 6                                                             | NM_001163997 | 0.007 |
| 15194051 | MYO5B        | Myosin VB                                                                         | XM_003121434 | 0.001 |
| 15198805 | PDCL         | Phosducin-like                                                                    | XM_001927696 | 0.003 |
| 15286002 | PHGDH        | Phosphoglycerate dehydrogenase                                                    | NM_001123162 | 0.000 |
| 15268536 | PSPH         | Phosphoserine phosphatase                                                         | NM_001243221 | 0.006 |
| 15260400 | RASSF7       | Ras association domain family member 7                                            | XM_003122393 | 0.004 |
| 15235102 | RND3         | Rho family gtpase 3                                                               | NM_214296    | 0.007 |
| 15228053 | SCD          | Stearoyl-coa desaturase (delta-9-desaturase)                                      | NM_213781    | 0.007 |
| 15221605 | SERP1        | Stress-associated endoplasmic reticulum protein 1                                 | NM_001243260 | 0.003 |
| 15270271 | SLC9A2       | Solute carrier family 9, subfamily A (NHE2, cation proton antiporter 2), member 2 | NM_001100189 | 0.005 |
| 15259768 | TMCO6        | Transmembrane and coiled-coil domains 6                                           | XM_003124040 | 0.004 |
| 15194165 | TXNL1        | Thioredoxin-like 1                                                                | NM_001244276 | 0.007 |
| 15218159 | UBE2B        | Ubiquitin-conjugating enzyme E2B                                                  | NM_001257356 | 0.010 |
| 15321630 | UBE2D3       | Ubiquitin-conjugating enzyme E2D 3                                                | NM_001078673 | 0.006 |
| 15227915 | UBTD1        | Ubiquitin domain containing 1                                                     | XM_003359315 | 0.007 |
| 15284156 | XKR4         | XK, Kell blood group complex subunit-related family, member 4                     | XM_003355057 | 0.006 |
| 15221539 | ZIC1         | Zic family member 1                                                               | XM_003358599 | 0.005 |
| 15225194 | ZMAT5        | Zinc finger, matrin-type 5                                                        | XM_001929010 | 0.004 |
| 15302378 | ZNF181       | Zinc finger protein 181                                                           | NM_001244818 | 0.001 |
| 15344815 |              | ---                                                                               | ---          | 0.000 |
| 15345937 |              | ---                                                                               | ---          | 0.000 |
| 15349723 |              | ---                                                                               | ---          | 0.000 |
| 15347387 |              | ---                                                                               | ---          | 0.001 |
| 15182061 |              | ---                                                                               | ---          | 0.001 |
| 15258761 |              | ---                                                                               | ---          | 0.001 |
| 15233088 |              | ---                                                                               | ---          | 0.001 |
| 15240879 |              | ---                                                                               | ---          | 0.002 |
| 15332195 |              | ---                                                                               | ---          | 0.002 |

|          |     |     |       |
|----------|-----|-----|-------|
| 15276173 | --- | --- | 0.002 |
| 15180499 | --- | --- | 0.002 |
| 15232252 | --- | --- | 0.002 |
| 15195023 | --- | --- | 0.002 |
| 15272119 | --- | --- | 0.002 |
| 15342067 | --- | --- | 0.002 |
| 15346419 | --- | --- | 0.003 |
| 15351163 | --- | --- | 0.003 |
| 15209896 | --- | --- | 0.003 |
| 15181739 | --- | --- | 0.003 |
| 15344923 | --- | --- | 0.003 |
| 15290393 | --- | --- | 0.003 |
| 15341709 | --- | --- | 0.003 |
| 15181633 | --- | --- | 0.004 |
| 15342887 | --- | --- | 0.004 |
| 15279019 | --- | --- | 0.004 |
| 15182949 | --- | --- | 0.004 |
| 15347493 | --- | --- | 0.004 |
| 15181475 | --- | --- | 0.005 |
| 15182773 | --- | --- | 0.005 |
| 15345617 | --- | --- | 0.005 |
| 15256666 | --- | --- | 0.005 |
| 15347037 | --- | --- | 0.005 |
| 15339967 | --- | --- | 0.005 |
| 15340953 | --- | --- | 0.006 |
| 15182761 | --- | --- | 0.006 |
| 15350707 | --- | --- | 0.006 |
| 15350863 | --- | --- | 0.006 |
| 15184164 | --- | --- | 0.006 |
| 15282393 | --- | --- | 0.006 |
| 15286988 | --- | --- | 0.006 |
| 15273431 | --- | --- | 0.006 |
| 15280254 | --- | --- | 0.007 |
| 15339819 | --- | --- | 0.007 |
| 15351493 | --- | --- | 0.007 |
| 15314718 | --- | --- | 0.007 |

|          |     |     |       |
|----------|-----|-----|-------|
| 15341149 | --- | --- | 0.007 |
| 15286729 | --- | --- | 0.007 |
| 15326843 | --- | --- | 0.007 |
| 15332776 | --- | --- | 0.007 |
| 15349625 | --- | --- | 0.008 |
| 15349601 | --- | --- | 0.008 |
| 15182561 | --- | --- | 0.008 |
| 15249513 | --- | --- | 0.008 |
| 15347693 | --- | --- | 0.008 |
| 15221666 | --- | --- | 0.008 |
| 15182789 | --- | --- | 0.008 |
| 15344477 | --- | --- | 0.008 |
| 15244806 | --- | --- | 0.008 |
| 15349439 | --- | --- | 0.008 |
| 15346091 | --- | --- | 0.009 |
| 15340753 | --- | --- | 0.009 |
| 15182951 | --- | --- | 0.009 |
| 15339581 | --- | --- | 0.009 |
| 15281243 | --- | --- | 0.009 |
| 15245843 | --- | --- | 0.009 |
| 15339337 | --- | --- | 0.009 |
| 15271887 | --- | --- | 0.010 |
| 15279096 | --- | --- | 0.010 |
| 15182455 | --- | --- | 0.010 |
| 15342033 | --- | --- | 0.010 |
| 15253611 | --- | --- | 0.010 |

<sup>a</sup> The gene transcript ID were retrived from the NetAffx calssification system (Affymetrix, Inc.).

<sup>b</sup> The "---" signs indicate that no annotation had been made to the corresponding DNA or RNA sequences of porcine origin.

<sup>c</sup> The accession number for the gene sequences resided in the GenBank database (<http://www.ncbi.nlm.nih.gov>).

<sup>d</sup> *P*-value was obtained from the ANOVA test using the Partek Genomics Suite (PGS) software.
